# Supplementary material for: Gestational diabetes mellitus changes the DNA methylation profile in cord blood and leads to neonatal immune dysregulation
Source: Research Square preprint supplement (doi:10.21203/rs.3.rs-2205773/v1), 2022-10-28
Supplement: Supplementary file 1 [file 0c92b6ac6794b96944d36cca.xlsx]

## Sheet: Table 3
Table 3 Genes associated with GDM identified by integration analysis of DMPs and transcriptome
gene	baseMean	log2FoldChange	stat	pvalue	padj
GIPC3	5.42	-1.76527	-4.15587	3.24053e-05	0.302949
KIF21A	7.88709	2.46376	4.00497	6.20244e-05	0.386567
DCN	2.16283	1.32648	2.06217	0.039192	0.998067
MYO3B	2.83916	1.35271	2.70467	0.00683722	0.998067
MOCOS	2.26682	1.40471	2.40778	0.0160499	0.998067
PTHLH	0.816324	1.74481	2.15793	0.030933	0.998067
UPK3A	0.820435	1.55232	2.00234	0.0452483	0.998067
ARHGEF10	17.4438	1.06896	2.99019	0.00278806	0.998067
DNTT	1.21693	-1.42632	-2.29492	0.0217374	0.998067
HLF	6.1023	1.14083	2.55198	0.0107111	0.998067
B3GAT1	2.30534	1.58409	2.08967	0.0366472	0.998067
IL12B	1.28409	1.31466	2.21521	0.0267454	0.998067
MTUS2	0.473888	1.76281	2.138	0.0325166	0.998067
FRAS1	6.2688	-1.24035	-3.24508	0.0011742	0.998067
ACVRL1	1.7788	1.78972	2.62666	0.00862271	0.998067
CYR61	1.4463	1.69882	2.08695	0.0368922	0.998067
SLC44A3	3.82815	1.09868	3.14566	0.00165713	0.998067
IGFBP3	3.16889	1.54579	2.72433	0.00644317	0.998067
ADAMTS12	0.996436	1.55131	2.20088	0.0277444	0.998067
JAKMIP1	0.844074	2.45409	2.2489	0.024519	0.998067
L3MBTL4	7.01002	1.7237	3.52303	0.000426639	0.998067
KCNMA1	2.19052	1.91736	2.91003	0.00361398	0.998067
CPA5	2.31898	-1.13367	-2.44517	0.0144784	0.998067
ANKLE1	27.8639	-1.02564	-2.77051	0.00559692	0.998067
HSF2BP	1.61889	-1.04133	-2.09803	0.0359021	0.998067
LMOD1	0.92649	-1.36104	-2.06379	0.0390374	0.998067
EFHB	3.55336	1.36975	2.55967	0.0104771	0.998067
TLR3	5.7043	1.24477	2.10092	0.0356482	0.998067
BEND7	9.66619	1.03031	2.37406	0.0175939	0.998067
KIAA1462	5.69378	1.27112	2.57086	0.0101447	0.998067
ZNF219	11.0966	1.06823	3.1948	0.00139928	0.998067
SCARA5	0.727938	-1.77288	-2.41179	0.0158745	0.998067
SHOX2	3.20931	1.30514	2.56861	0.0102108	0.998067
CDH2	1.65393	1.39402	2.09343	0.0363104	0.998067
SGCD	1.12738	1.61683	2.06676	0.0387567	0.998067
PLEKHG5	1.90523	-1.41702	-2.6156	0.00890718	0.998067
CD248	4.13643	-1.03169	-2.47621	0.0132784	0.998067
KLHDC7A	1.29056	1.70419	2.73954	0.00615255	0.998067
KIAA1875	3.86716	-1.05381	-2.39002	0.0168476	0.998067
BAI1	1.31587	-1.30359	-1.98182	0.0474993	0.998067
PNMAL1	1.00041	2.06112	1.99537	0.0460021	0.998067
RGS7	0.981853	1.40189	2.15358	0.0312728	0.998067
CADM1	2.6989	1.4267	2.33436	0.0195769	0.998067
NPB	1.06681	-1.82191	-2.22215	0.0262735	0.998067
KCNJ12	1.00279	1.82656	2.5167	0.011846	0.998067
HIST1H1B	908.284	-1.15271	-3.34993	0.000808321	0.998067
TMPRSS11A	2.48609	-1.33273	-2.21269	0.0269193	0.998067
KIF19	0.869347	1.80245	2.42951	0.0151194	0.998067
PRTN3	26.8904	-1.01145	-2.13495	0.0327651	0.998067
IL27	4.12199	1.30387	3.43063	0.000602191	0.998067
ARHGAP23	8.85148	-1.10995	-2.7717	0.00557643	0.998067
C4orf48	3.38242	1.17217	2.35531	0.0185074	0.998067
