# Supplementary material for: Gestational diabetes mellitus changes the DNA methylation profile in cord blood and leads to neonatal immune dysregulation
Source: Research Square preprint supplement (doi:10.21203/rs.3.rs-2205773/v1), 2022-10-28
Supplement: Supplementary file 2 [file 420f6c834b3bc476fe6b09e3.xlsx]

## Sheet: Table 2
Table 2 Anthropometric and metabolic parameters of pregnant women and newborns
Parameters	Control(n = 10)	GDM(n = 20)	p-value
Maternal age(years)	30.5±2.51	29.65±5.07	0.543857
Maternal height(m)	1.63±0.05	1.61±0.04	0.229962
Maternal weight(kg)	75.61±11.1	74.48±10.09	0.790816
Graviditas(n)	2±1	2±1	0.500378
Parity(n)	2±1	1±1	0.0874774
Gestational weight gain(kg)	14.2±3.55	12.97±5.37	0.463177
Prepregnancy BMI(kg/m2)	28.35±3.95	28.7±3.44	0.81748
Maternal BMI(kg/m2)	33.72±4.24	33.73±4.15	0.996839
Fasting glucose(mmol/L)	4.07±0.24	4.87±0.45	9.01417e-07
1 h glucose(mmol/L)	7.19±0.78	9.9±1.29	1.14657e-07
2 h glucose(mmol/L)	5.75±0.79	8.36±0.88	7.3271e-08
Gestational weeks(week)	41.5±2.55	41.05±2.52	0.65294
baby weight(g)	3429±339.72	3415±374.55	0.919174
BMI: Body mass index; OGTT: Oral glucose tolerance test;
