# Supplementary material for: Gestational diabetes mellitus changes the DNA methylation profile in cord blood and leads to neonatal immune dysregulation
Source: Research Square preprint supplement (doi:10.21203/rs.3.rs-2205773/v1), 2022-10-28
Supplement: Supplementary file 3 [file 63a64f0a825a1b67f0941a1d.xlsx]

## Sheet: Table 1
Table 1 Public datasets reference details
GEO accession	Platforms	TYPE	Sample(n)	Threshold Value
GSE203169	GPL24676	RRBS	41	p. adjust < 0.05
GSE203346	GPL24676	RNA-seq	41	logFC > 1 p-value < 0.05
GSE153219	GPL13534	DNA 450K BeadChip	42	p. adjust < 0.05
GSE88929	GPL13534	DNA 450K BeadChip	132	p. adjust < 0.05
GSE141065	GPL21145	DNA EPIC BeadChip	566	p. adjust < 0.05
GSE65737	GPL16956	lncRNA BeadChip	6	logFC > 1 p. adjust < 0.05
RRBS: Reduced representation bisulfte sequencing; RNA-seq: RNA-sequencing;lncRNA: long non-coding RNA; logFC: log fold changes;
