# Supplementary material for: Gestational diabetes mellitus changes the DNA methylation profile in cord blood and leads to neonatal immune dysregulation
Source: Research Square preprint supplement (doi:10.21203/rs.3.rs-2205773/v1), 2022-10-28
Supplement: Supplementary file 4 [file 9561debf042ce1db637d9675.xlsx]

## Sheet: Table 5
Table 5 Methylation degree of each DMP of hub gene in GDM cord blood
Probe	logFC	t	P.Value	adj.P.Val	CHR	gene	feature	cgi
cg24587427	0.0040979	3.47338	0.00160253	0.0323952	6	HIST1H1B	TSS1500	shore
cg00700007	-0.005003	-4.18151	0.000235775	0.0116371	6	HIST1H1B	TSS200	island
cg27535410	-0.0517969	-4.45922	0.000109148	0.00775813	19	PRTN3	Body	island
cg27234823	-0.0322763	-3.72916	0.000810135	0.0224008	19	PRTN3	Body	island
cg05257528	-0.0447728	-3.53218	0.00137166	0.029832	19	PRTN3	Body	island
cg21462596	-0.0480856	-3.47685	0.00158792	0.0322448	19	PRTN3	Body	island
