# Supplementary material for: Gestational diabetes mellitus changes the DNA methylation profile in cord blood and leads to neonatal immune dysregulation
Source: Research Square preprint supplement (doi:10.21203/rs.3.rs-2205773/v1), 2022-10-28
Supplement: Supplementary file 5 [file d93ce85437dbf764afea0832.xlsx]

## Sheet: Table 4
Table 4 Genes associated with GDM identified by WGCNA analyse
gene	baseMean	log2FoldChange	stat	pvalue	padj
LTF	1704.93	-0.674266	-1.96827	0.0490364	0.998067
COL17A1	90.6399	-0.580823	-2.19806	0.027945	0.998067
CTSG	154.941	-1.16991	-2.53082	0.0113798	0.998067
HIST1H2BJ	219.395	-0.787779	-2.63388	0.00844146	0.998067
HIST1H3B	1108.83	-0.905715	-2.48751	0.0128642	0.998067
HIST1H2AB	282.28	-0.810814	-2.35019	0.0187637	0.998067
KIF2C	40.9581	-0.73869	-2.64374	0.00819962	0.998067
LCN2	727.668	-0.828116	-2.16117	0.0306823	0.998067
CCNB2	28.1695	-0.543795	-2.11033	0.0348296	0.998067
HIST1H2BD	1176.45	-0.588609	-2.0316	0.0421943	0.998067
DEFA4	572.807	-1.07104	-2.40784	0.0160472	0.998067
KIAA0101	48.3214	-0.769816	-2.77191	0.00557283	0.998067
HIST1H2BI	356.105	-0.821439	-2.51483	0.0119091	0.998067
HIST1H2AE	944.611	-0.688004	-2.18492	0.0288949	0.998067
HIST1H1E	438.133	-0.578921	-2.2185	0.0265206	0.998067
RNASE3	229.78	-0.966152	-2.13155	0.0330441	0.998067
TLN2	126.24	-0.549972	-2.23692	0.0252913	0.998067
SPTBN2	4.56656	-0.940599	-1.97502	0.0482663	0.998067
HIST2H4B	304.882	-0.502652	-2.58416	0.00976158	0.998067
HIST1H2AJ	923.934	-1.03874	-2.72213	0.00648625	0.998067
HIST2H4A	1961.4	-0.670078	-2.13956	0.0323906	0.998067
HIST2H2AB	217.153	-0.653659	-2.40597	0.0161297	0.998067
HIST1H1B	908.284	-1.15271	-3.34993	0.000808321	0.998067
HIST1H2AH	506.688	-0.92164	-2.45443	0.014111	0.998067
HIST1H2BL	240.519	-1.08024	-2.8073	0.0049959	0.998067
HIST1H2BG	346.34	-0.599458	-2.09132	0.0364993	0.998067
FAM72B	14.1	-0.687799	-2.06291	0.0391214	0.998067
HIST1H4D	760.583	-0.774224	-2.3865	0.0170096	0.998067
HIST1H4A	257.777	-1.07048	-2.7568	0.00583701	0.998067
HIST1H2BB	80.1428	-0.7673	-2.01167	0.0442543	0.998067
HIST1H2BO	292.704	-0.985127	-2.84532	0.00443664	0.998067
HIST1H2BM	276.178	-1.03017	-2.86344	0.00419066	0.998067
PRTN3	26.8904	-1.01145	-2.13495	0.0327651	0.998067
HIST1H3C	646.443	-0.961989	-2.58183	0.00982772	0.998067
HIST1H2AI	590.883	-0.860817	-2.65584	0.00791102	0.998067
HIST1H2AG	967.74	-0.806845	-2.44634	0.0144313	0.998067
HIST1H3E	36.2813	-0.754847	-2.83413	0.00459513	0.998067
HIST1H4C	1823.09	-0.648778	-2.31926	0.0203807	0.998067
HIST1H3J	233.921	-1.01606	-2.84757	0.00440549	0.998067
HIST1H3D	1702.68	-0.684306	-2.62726	0.00860753	0.998067
HIST1H2BH	251.348	-0.851107	-2.38578	0.0170431	0.998067
ELANE	65.7374	-0.757478	-2.16242	0.0305855	0.998067
HIST1H2BE	339.787	-0.770874	-2.33095	0.0197562	0.998067
HIST1H2BF	397.251	-0.575103	-2.04646	0.0407109	0.998067
HIST1H4K	189.022	-0.946502	-2.57894	0.00991039	0.998067
HIST1H4F	577.919	-0.613986	-2.06005	0.0393941	0.998067
HIST1H4I	236.341	-0.601661	-2.14782	0.0317282	0.998067
HIST1H2AL	270.098	-0.880726	-2.41055	0.0159285	0.998067
HIST2H3C	280.379	-0.824537	-2.46126	0.0138451	0.998067
HIST1H3H	1217.7	-0.727082	-2.21705	0.0266199	0.998067
HIST2H3A	280.379	-0.824537	-2.46126	0.0138451	0.998067
DEFA1	27742.1	-1.00381	-2.10702	0.0351157	0.998067
HIST1H2AM	918.105	-0.843338	-2.65293	0.00797973	0.998067
HIST1H2BN	157.563	-0.596239	-2.25181	0.0243345	0.998067
KIFC1	28.106	-0.571569	-2.08663	0.0369218	0.998067
AQP1	71.7321	-0.699996	-2.24001	0.0250902	0.998067
HIST1H3G	288.395	-1.09908	-3.00511	0.00265483	0.998067
HIST1H3F	456.213	-0.888383	-2.46589	0.0136671	0.998067
